# Supplementary material for: Maintenance of Tissue Pluripotency by Epigenetic Factors Acting at Multiple Levels
Source: PubMed Central journal article supplement (PMC4771708; doi:10.1371/journal.pgen.1005897), 2016-02-29

**S3 Fig.**

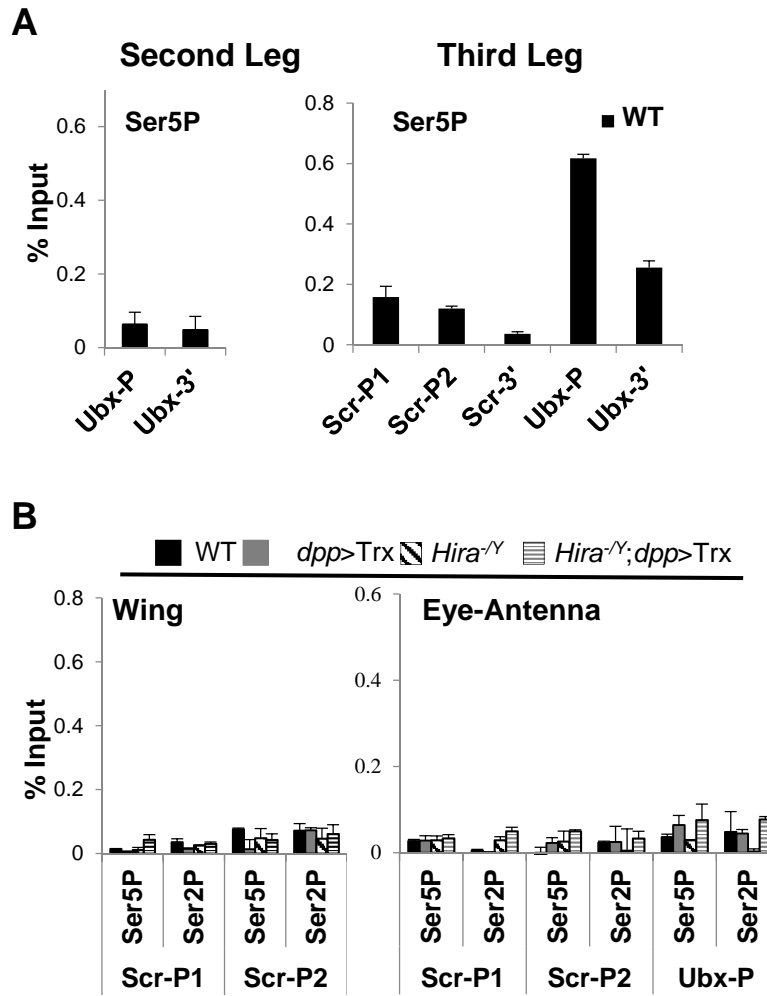

Supplement: pgen.1005897.s003.pdf [file pgen.1005897.s003.pdf]
