# Supplementary material for: Maintenance of Tissue Pluripotency by Epigenetic Factors Acting at Multiple Levels
Source: PubMed Central journal article supplement (PMC4771708; doi:10.1371/journal.pgen.1005897), 2016-02-29

S12 Fig.

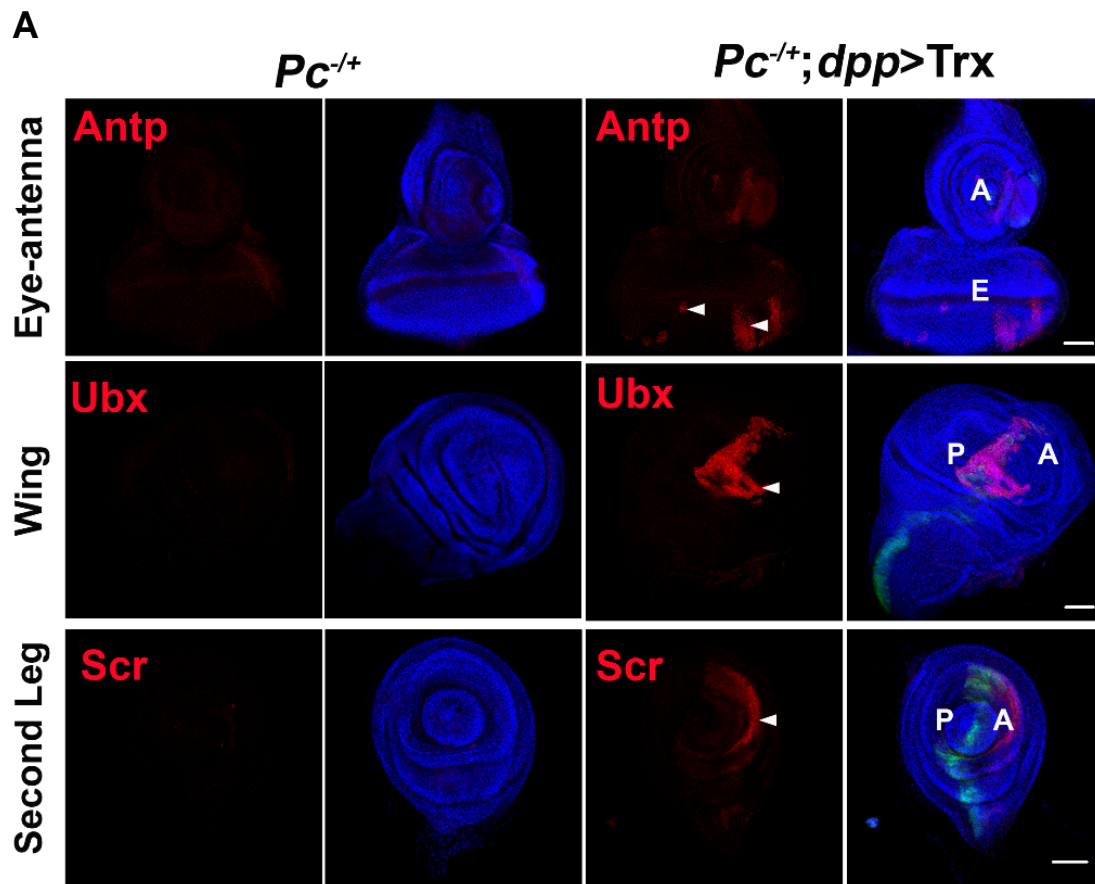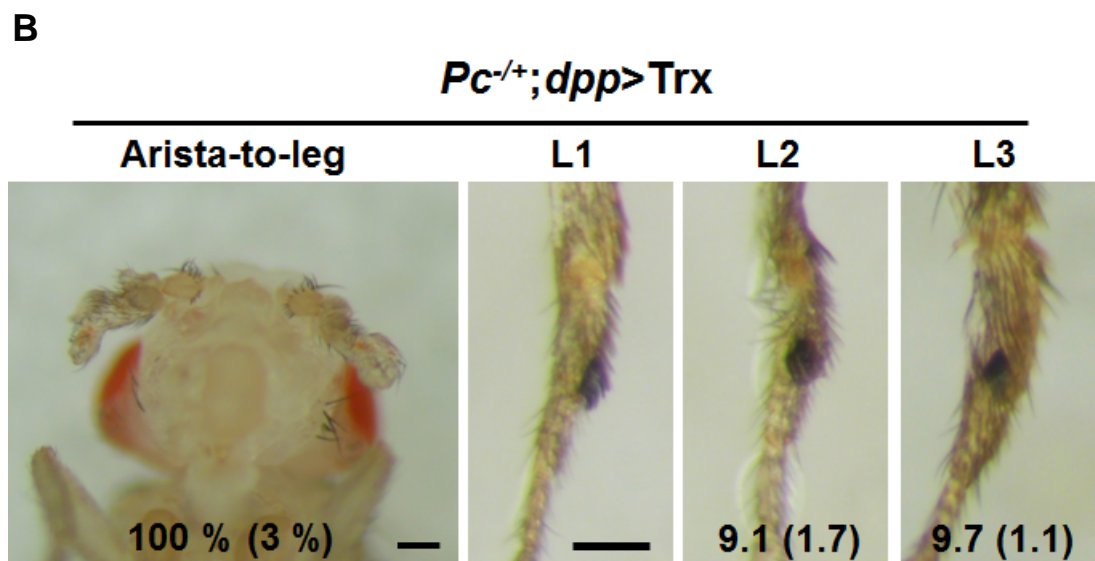

Supplement: pgen.1005897.s012.pdf [file pgen.1005897.s012.pdf]
