# Supplementary material for: Maintenance of Tissue Pluripotency by Epigenetic Factors Acting at Multiple Levels
Source: PubMed Central journal article supplement (PMC4771708; doi:10.1371/journal.pgen.1005897), 2016-02-29
Supplement: pgen.1005897.s013.pdf [file pgen.1005897.s013.pdf]

**S1 Table. Wing phenotypes in RNAi backgrounds.**

| <b>Function</b>                                        | <b><i>UAS-RNAi/<br/>Mutant</i></b> | <b>Gal4</b>         | <b>Wing phenotype</b> | <b>Stock ID</b> |
|--------------------------------------------------------|------------------------------------|---------------------|-----------------------|-----------------|
| <b>Control</b>                                         | TRXi                               | <i>dpp</i>          | +++                   | GD4502          |
| <b>Negative<br/>Elongation Factors</b>                 | NELF-Di                            | <i>A9 &amp; dpp</i> | +++                   | GD42217         |
|                                                        | NELF-EIRi                          | <i>A9 &amp; dpp</i> | ++                    | BL6788          |
|                                                        | NELF-Bi                            | <i>dpp</i>          | +                     | GD17038         |
| <b>Positive<br/>Elongation Factors</b>                 | PAFi                               | <i>dpp</i>          | +++                   | GD20876         |
|                                                        | CDK7i                              | <i>A9</i>           | -                     | GD10442         |
|                                                        | CYCTi                              | <i>dpp</i>          | -                     | GD37562         |
|                                                        | SPT6i                              | <i>dpp</i>          | -                     | GD31703         |
|                                                        | SPT5i                              | <i>dpp</i>          | +                     | GD19793         |
|                                                        | <i>Spt5<sup>MGE-3</sup></i>        | <i>dpp</i>          | +                     | BL8352*         |
|                                                        | ASFi                               | <i>dpp</i>          | ++                    | GD23737         |
| <b>Chromatin<br/>Remodeling<br/>Factors and others</b> | SPT16i                             | <i>dpp</i>          | -                     | GD10916         |
|                                                        | BRMi                               | <i>A9</i>           | -                     | GD37720         |
|                                                        | CHDi                               | <i>dpp</i>          | -                     | GD26277         |
|                                                        | NURFi                              | <i>A9</i>           | -                     | GD24740         |
|                                                        | ASH1i                              | <i>A9</i>           | -                     | GD28982         |
|                                                        | <i>ash1<sup>22</sup></i>           | <i>A9</i>           | -                     | BL24161*        |
|                                                        | <i>Nej<sup>P</sup></i>             | <i>A9</i>           | +                     | BL3728*         |

Females carrying *UAS-Trx* with or without *UAS-RNAi/Mutant* were crossed to *dpp-Gal4* or *A9-Gal4* males, except for CDK7i, BRMi, ASH1i, NURFi, *ash1<sup>22</sup>* and *Nej<sup>P</sup>*. In these cases, females carrying *A9-Gal4* and *UAS-RNAi/Mutant* were crossed to *UAS-Trx* males. Wing phenotype produced by *dpp-Gal4* is used as the reference. Progenies with similar phenotypes or restored wing are marked as (-) or (+), respectively. Fully restored wings are indicated as (+++). “\*”, mutants used for screening. BL and GD refer to Bloomington and Vienna stock centers, respectively.
