# Supplementary material for: Maintenance of Tissue Pluripotency by Epigenetic Factors Acting at Multiple Levels
Source: PubMed Central journal article supplement (PMC4771708; doi:10.1371/journal.pgen.1005897), 2016-02-29
Supplement: pgen.1005897.s016.pdf [file pgen.1005897.s016.pdf]

**S4 Table. List of primers.**

| Primer        | Sequence 5' to 3'         | Position to TSS | Reference |
|---------------|---------------------------|-----------------|-----------|
| Antp-P1       | CGTGGGCTAAGTCAACGGAA      | 0               |           |
|               | AAGGAGTTCTCGCTGGGATT      |                 |           |
| Antp-P1 +0.1K | AGAGCCCAGCCCCAAGATA       | +0.1 kb         |           |
|               | CAACAAAGCACTCGAGGACC      |                 |           |
| Antp-P1 +1K   | CAACGTTTTCTAGTCCCCCG      | +1 kb           |           |
|               | AAAGTTTGCCCGCAGTGG        |                 |           |
| Antp-P2       | AAGCAAAGTGCGAATCGAGC      | 0 kb            |           |
|               | TCACTGGCGTTCAGTTGTGA      |                 |           |
| Antp-P2 +0.1K | CTGGGAATGAACCGAACGGA      | +0.1 kb         |           |
|               | GACGTGCCAAATAGACGTGC      |                 |           |
| Antp-P2 +1K   | TGTGTGGAAACGATGCGAATG     | +1 kb           |           |
|               | AACGAGTGTAAGCCGAGCA       |                 |           |
| Antp-3'       | CTCGCCCTTCGTCTTGTCT       | +100.5 kb       |           |
|               | GAAGGCAGACATACACCCGG      |                 |           |
| Scr-P1        | ACTTCGCGGATTGCTACGC       | 0 kb            |           |
|               | AAGGCAACGCACGAGAGG        |                 |           |
| Scr-P2        | ACACGCGGAACAGCTGAGT       | 0 kb            |           |
|               | GTATGAGTGAGCCAGAGCGCT     |                 |           |
| Scr-3'        | CGAACTGCGACGGATGGATA      | +24 kb          |           |
|               | GAAGGAGCACAAGATGGCCT      |                 |           |
| bx-d-1        | TAGTCTTATCTGTATCTCGCTCTTA | -29.6 kb        | [1]       |
|               | CAGAACCAAAGTGCCGATAACTC   |                 |           |
| bx-d-2        | GCACGCACTAAACCCCATAA      | -28.9 kb        |           |
|               | TCCACCTCCTCTCCTCTCTC      |                 |           |
| Ubx-P         | GCGCTCTCTCTTGAGTGTTTCGT   | 0 kb            | [2]       |
|               | GGCGAGCGCATTTTCCTT        |                 |           |
| Ubx +0.1K     | TCCAATCCGTTGCCATCGAACGAAT | +0.1 kb         |           |
|               | TTAGGCCGAGTCGAGTGAGTTGAGT |                 |           |
| Ubx +1K       | AATTGGTTTCCAGGGATCTGC     | +1 kb           | [1]       |
|               | ATCCAAAGGAGGCAAAGGAAC     |                 |           |
| bx            | CCATAAGAAATGCCACTTTGC     | +31.7 kb        |           |
|               | CTCTCACTCTCTCACTGTGAT     |                 |           |
| Ubx-3'        | AGTTCCACACGAATCATTATCTGAC | +74 kb          |           |
|               | CTTCATTGCGCCGGTTCTGGA     |                 |           |

**Primers used for RT-qPCR**

|       |                       |
|-------|-----------------------|
| Ubx   | GCTCACTTCTACCAGACTGGC |
|       | CTTCATTGCGCCGGTTCTGGA |
| Scr   | CCGTGGATGAAGCGAGTACA  |
|       | ACCCATGTGGTAGGGTACGA  |
| Antp  | ATGCCGTCTCCACTGTATCC  |
|       | CGACGGGTCAAGTAGCGATT  |
| Rpl32 | ACTTCATCCGCCACCAGTCGG |
|       | CGCTCGACAATCTCCTTGCGC |

## References

1. Gambetta MC, Oktaba K, Muller J. Essential role of the glycosyltransferase *sxc/Ogt* in polycomb repression. *Science*. 2009;325(5936):93-6. doi: 10.1126/science.1169727 PMID: 19478141
2. Chopra VS, Hong JW, Levine M. Regulation of Hox gene activity by transcriptional elongation in *Drosophila*. *Curr Biol*. 2009;19(8):688-93. doi: 10.1016/j.cub.2009.02.055 PMID: 19345103
