# Supplementary material for: Maintenance of Tissue Pluripotency by Epigenetic Factors Acting at Multiple Levels
Source: PLOS journal article supplement (doi:10.1371/journal.pgen.1005897), 2016-02-29
Supplement: S15 (10.1371/journal.pgen.1005897.s015) [file journal.pgen.1005897.s015]

**S3 Table. Induction of arista-to-leg transformation.**

| <b>Trx<br/>Induced</b> | <b>Arista-to-leg</b> |                                                         |
|------------------------|----------------------|---------------------------------------------------------|
|                        | <i>dpp&gt;Trx</i>    | <i>Hira</i> <sup>-<i>Y</i></sup> ;<br><i>dpp&gt;Trx</i> |
| 96 h                   | 0.6 (168)            | 2.8 (112)                                               |
| 120 h                  | 2.3 (128)            | 7.3 (110)                                               |
| 144 h                  | 2.5 (122)            | 22.0 (91)                                               |
| 168 h                  | 3.7 (134)            | 39.5 (86)                                               |

Crosses were done as described in Table 3. The percentage of arista-to-leg transformation is shown. The number of scored arista is indicated in parentheses.
